# Supplementary material
Source: PubMed Central journal article supplement (PMC5712823)

Supplement Figure 1. Immunofluorescent triple staining for cells expressing cytoplasmic and surface IgD (white), IgM (red), and IgA (green) in tonsil germinal centers

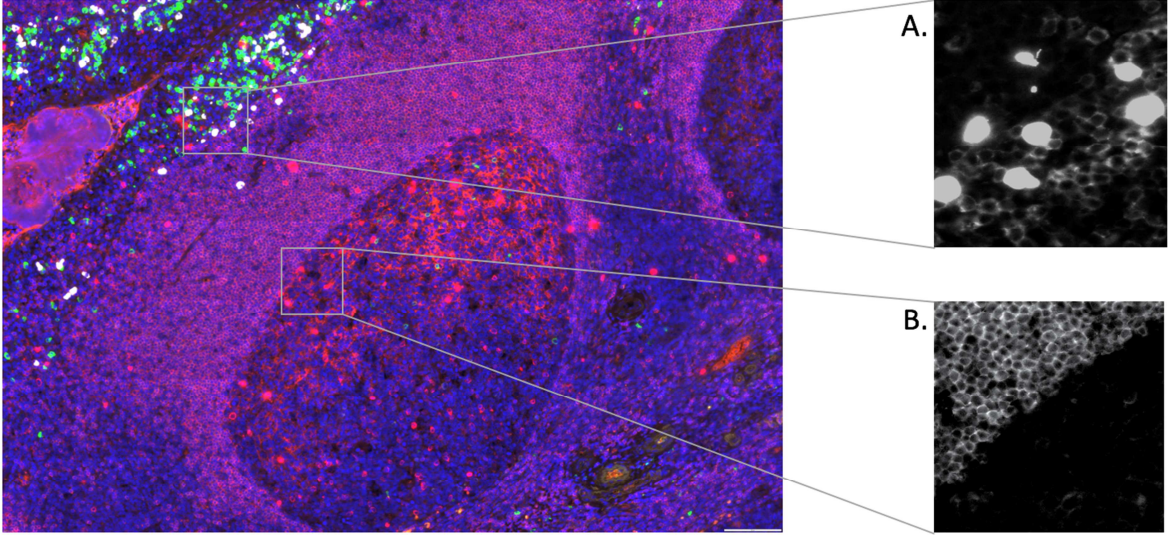

Supplement Figure 2: Low power image showing distribution of IgD, IgA, and IgM in sinus tissue.

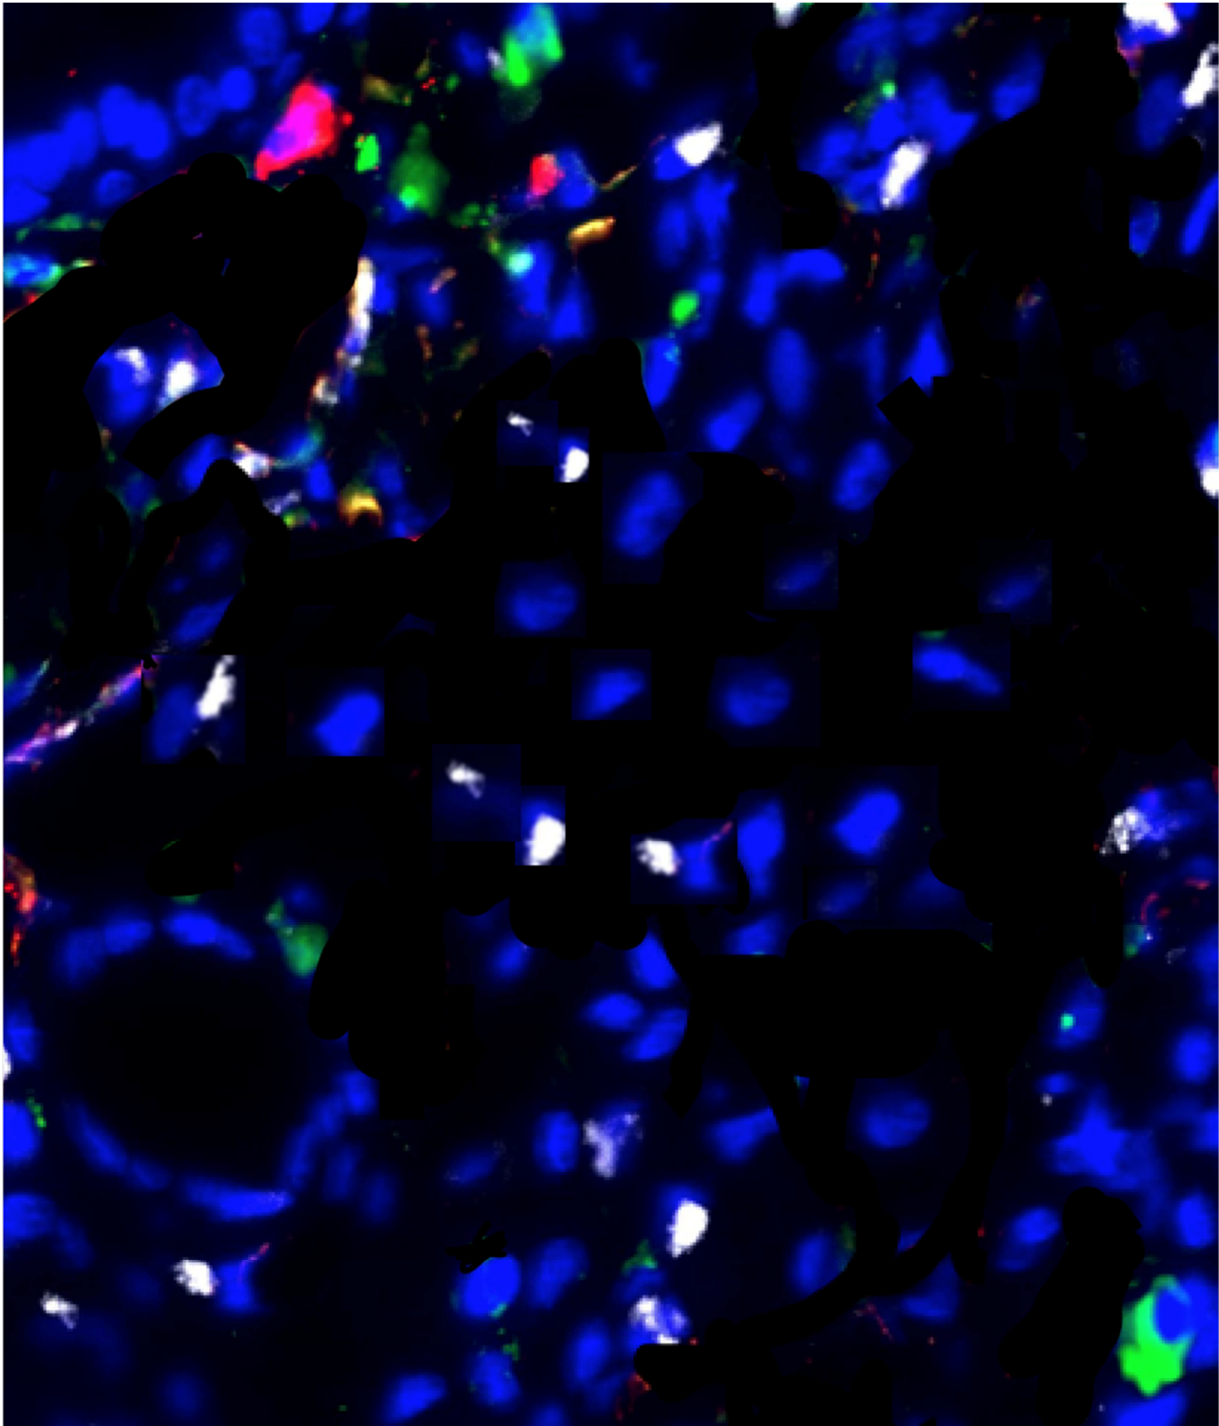

Supplement: NIHMS921712-supplement-supplement_1.pdf [file NIHMS921712-supplement-supplement_1.pdf]
